# Supplementary material for: Production of long-chain free fatty acids from metabolically engineered Rhodobacter sphaeroides heterologously producing periplasmic phospholipase A2 in dodecane-overlaid two-phase culture
Source: PubMed Central journal article supplement (PMC6357386; doi:10.1186/s12934-019-1070-8), 2019-01-31
Supplement: 12934_2019_1070_MOESM1_ESM.pdf [file 12934_2019_1070_MOESM1_ESM.pdf]

Table S1. PCR primers used in this study

| Primer   | Sequence (5'-3')                                   | Notes                          |
|----------|----------------------------------------------------|--------------------------------|
| AccA-F   | GCT <b>CTA GAT</b> TCC TCC GGC GCT CGT GTG G       | <i>Xba</i> I is in boldface    |
| AccA-R   | AAC <b>TGC AGT</b> CAC GCC GCG AGG CCC TTC GAC     | <i>Pst</i> I is in boldface    |
| AccBC-F  | CAA <b>GCT TGT</b> TGT CCG GCG TCT TGT AGC         | <i>Hind</i> III is in boldface |
| AccBC-R  | GCT <b>CTA GAC</b> GGC GAA ATC CTC ATC CAC         | <i>Xba</i> I is in boldface    |
| AccD-F   | GCT <b>CTA GAG</b> TCT CCT CCG AAG CAG GCG C       | <i>Xba</i> I is in boldface    |
| AccD-R   | AAC <b>TGC AGT</b> CAC TCG GCG GCC TTG TCG TCG     | <i>Pst</i> I is in boldface    |
| CycA-F   | CCC <b>ATG GAT</b> GAA GTT CCA AGT C               | <i>Nco</i> I is in boldface    |
| CycA-R   | CTC <b>TAG ACG</b> CGA GCG CCG GCA GCG CCG CGA AT  | <i>Xba</i> I is in boldface    |
| FabD-F   | GCT <b>CTA GAA</b> GGA TCA TCA TAT CCG CAC AGT TC  | <i>Xba</i> I is in boldface    |
| FabD-R   | AAC <b>TGC AGT</b> CAG GCC GTG GCG GCA GCC GC      | <i>Pst</i> I is in boldface    |
| FabH-F   | GGG <b>GTA CCC</b> TAT GCC CGC AAC GGT CTC AGC CTC | <i>Kpn</i> I is in boldface    |
| FabH-R   | GCT <b>CTA GAT</b> GAA GCA CGG ATT CCA CCA G       | <i>Xba</i> I is in boldface    |
| PhoA-F   | CCT <b>GCA GGC</b> TCA GGG CGA TAT TAC TGC A       | <i>Pst</i> I is in boldface    |
| PhoA-R   | CAA <b>GCT TTT</b> ATT TCA GCC CCA GAG CGG         | <i>Hind</i> III is in boldface |
| PLA1-F   | GCT <b>CTA GAA</b> TGG CGA CCA TTC CCT CCC AC      | <i>Xba</i> I is in boldface    |
| PLA1-R   | CAA <b>GCT TTT</b> ACA AGA GTT GTG ATG GAT G       | <i>Hind</i> III is in boldface |
| PLA2-F   | CCC <b>ATG GCT</b> TAA CGT CGG TGT TCA GCT CAT     | <i>Nco</i> I is in boldface    |
| PLA2-F'  | CTC <b>TAG ACT</b> TAA CGT CGG TGT TCA GCT CAT     | <i>Xba</i> I is in boldface    |
| PLA2-R   | CAA <b>GCT TTT</b> AGG GTT TCT TGA GGA CTT TGC CG  | <i>Hind</i> III is in boldface |
| PLA2-t-F | CAT GCC <b>ATG GCT</b> TAA CGT CGG TGT TCA GCT     | <i>Nco</i> I is in boldface    |
| PLA2-t-R | GCT <b>GCA GGG</b> GTT TCT TGA GGA CTT TGC CG      | <i>Pst</i> I is in boldface    |

|           |                                                   |                                |
|-----------|---------------------------------------------------|--------------------------------|
| PlsC-F    | <b>CTC TAG AGC</b> CTC GTT GCC GTG ATG CTC CTG    | <i>Xba</i> I is in boldface    |
| PlsC-R    | <b>GGG TAC CGG</b> GCT TCT GCG CTA CGT CTT CGG    | <i>Kpn</i> I is in boldface    |
| PlsX-F    | CCC <b>AAG CTT</b> CGT CGC TTC CAA TCC GGC CGA G  | <i>Hind</i> III is in boldface |
| PlsX-R    | GCT <b>CTA GAA</b> GTT CGG GAC GAC ACG GTC G      | <i>Xba</i> I is in boldface    |
| PlsY-F    | <b>CGG TAC CGT</b> CCT CGC CCG GGC CTG TCA TTC AC | <i>Kpn</i> I is in boldface    |
| PlsY-R    | <b>GGA ATT CCG</b> CGG ACG AGC CCT CGA AGG GTT    | <i>Eco</i> RI is in boldface   |
| ToIC-UF   | <b>CCT GCA GAC</b> GTG GTG GTG GCG CCG AAC CG     | <i>Pst</i> I is in boldface    |
| ToIC-UR   | <b>CGG ATC CCA</b> TTG CCC TCT CCA CTG TCC CGT    | <i>Bam</i> HI is in boldface   |
| ToIC-DF   | <b>CAA GCT TTG</b> AGA CTT TCC TTC CTG CGG GGC A  | <i>Hind</i> III is in boldface |
| ToIC-DR   | <b>CGA ATT CGC</b> CGT CTC AGA CGC GCG CGA AGG    | <i>Eco</i> RI is in boldface   |
| Rt-FabH-F | CTT GCA GAA ACA GCG CAT AC                        |                                |
| Rt-FabH-R | AAG GTC GCC TTC CTT GAT CT                        |                                |
| Rt-PlsC-F | CAC CAG AGC TTC CTC GAT TC                        |                                |
| Rt-PlsC-R | GAC ATC GGC CAT CAT CTT CT                        |                                |
| Rt-PlsX-F | GTG GTC ACG ATG AAC GAC AA                        |                                |
| Rt-PlsX-R | GAT CAT CGA GAC TGC CAT CA                        |                                |
| Rt-PlsY-F | GAG TGC TGG GCT ATC TGC TC                        |                                |
| Rt-PlsY-R | CCC AGA AAC GAG GTG AAG G                         |                                |
| Rt-PLA2-F | CAG TGG ATG TCC TGG TGA GA                        |                                |
| Rt-PLA2-R | GCG TCG CAT TTG TTA CCT TT                        |                                |
| Rt-16S-F  | CAG CTC GTG TCG TGA GAT GT                        |                                |
| Rt-16S-R  | TAG CAC GTG TGT AGC CCA AC                        |                                |

---

Table S2. Expression of *pla2*<sup>a</sup> in the recombinant *R. sphaeroides* strains<sup>b</sup>.

| Rs-A2     | Rs-CA2                 | Rs-DCA2   | Rs-AccCA2 | Rs-HCA2   |
|-----------|------------------------|-----------|-----------|-----------|
| 1.0 ± 0.2 | 1.0 ± 0.1 <sup>c</sup> | 1.0 ± 0.1 | 1.1 ± 0.1 | 1.1 ± 0.2 |

<sup>a</sup>Expression of *pla2* was examined by RT-qPCR.

<sup>b</sup>Cells were grown photoheterotrophically in Sis minimal medium and harvested at the exponential growth phase (OD<sub>660</sub> of 2.3, 2.3, 2.4, 2.3 and 2.2 for Rs-A2, Rs-CA2, Rs-DCA2, Rs-AccCA2 and Rs-HCA2, respectively).

<sup>c</sup>Mean ratio (± SD) with respect to Rs-A2 from three independent experiments with 16S rRNA as a reference gene.

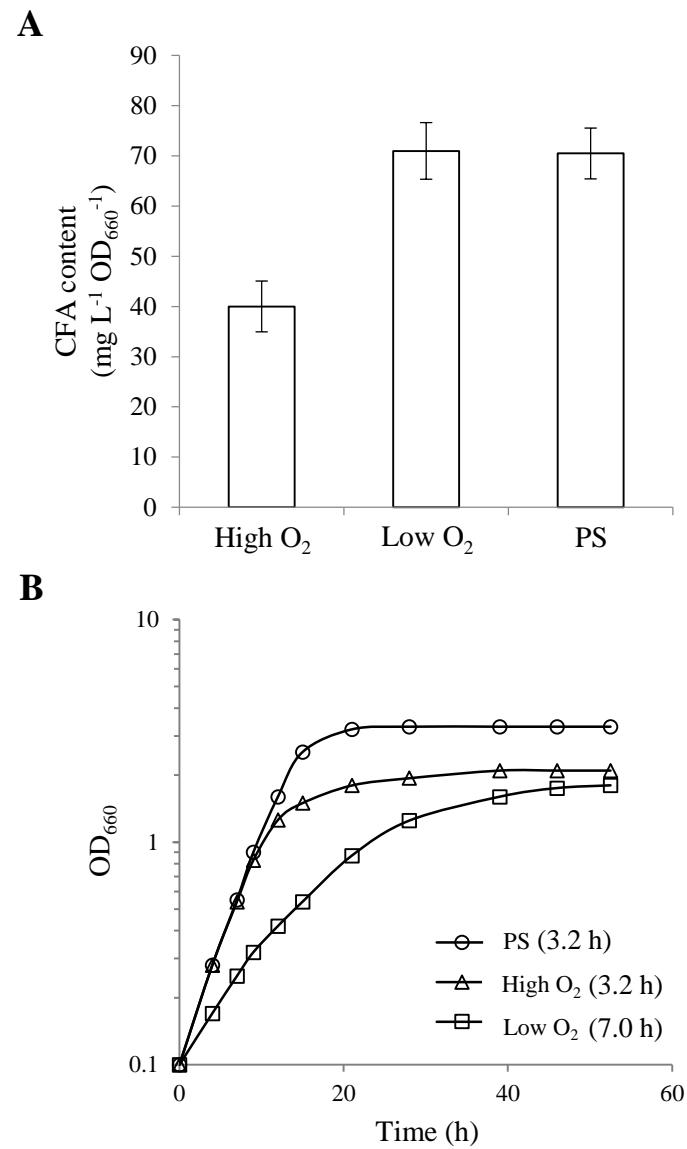

**Figure S1. Total cellular FA (CFA) content and growth profile of *R. sphaeroides* KD131 under aerobic, semiaerobic, and photoheterotrophic conditions.** (A) *R. sphaeroides* KD131 was grown in Sis minimal medium under aerobic (High O<sub>2</sub>), semiaerobic (Low O<sub>2</sub>), and photoheterotrophic (PS) conditions, and cells were harvested at the exponential growth phase (optical density at 660 nm (OD<sub>660</sub>) of 0.8, 0.9 and 1.6, respectively). The total CFA content is illustrated with error bars from three independent experiments. (B) Growth profiles of *R. sphaeroides* under the three different conditions are shown. Doubling time is shown in parentheses. The results shown are for one of three representative growth experiments.

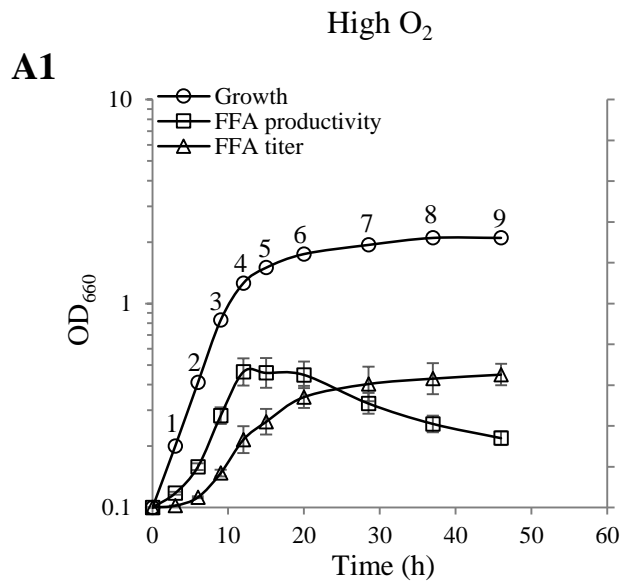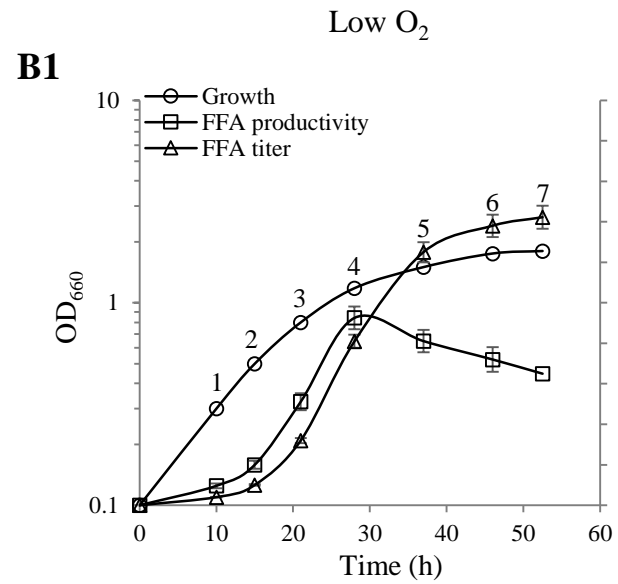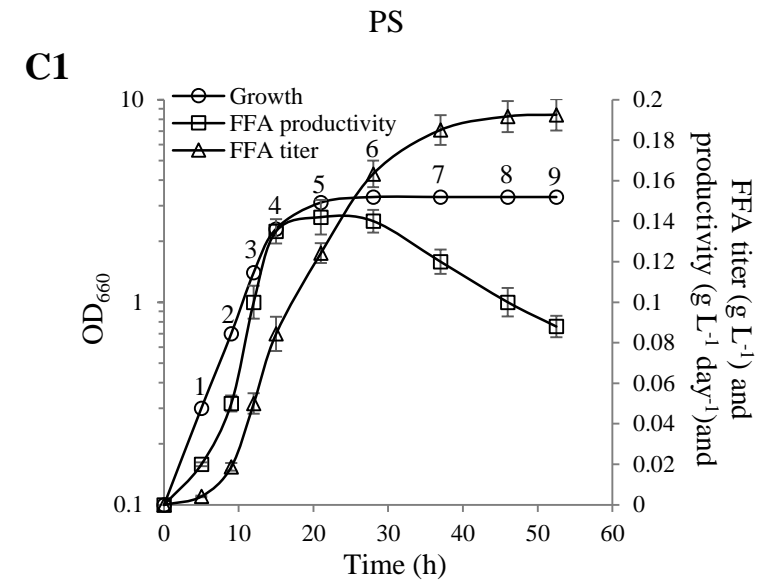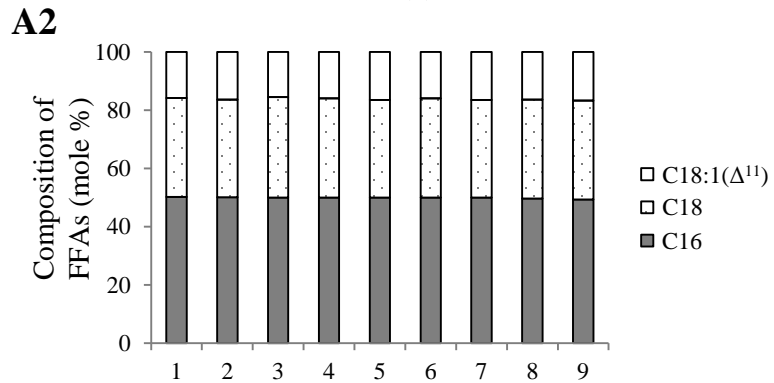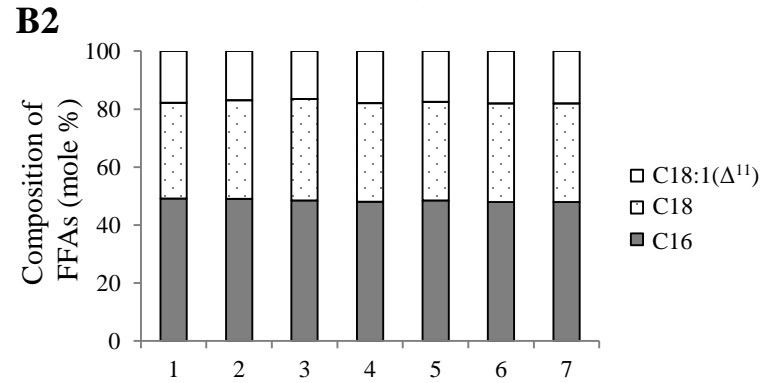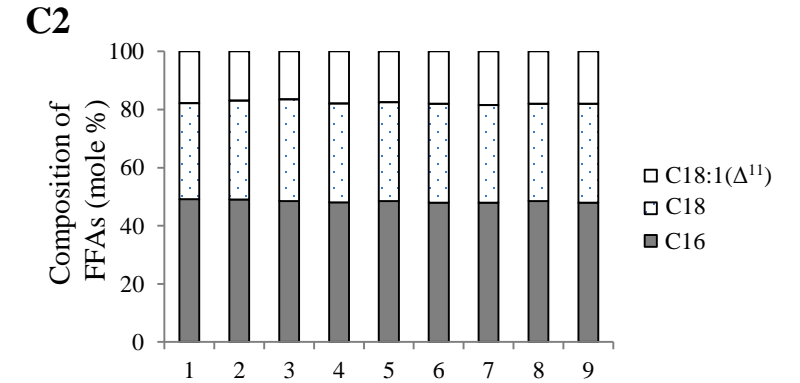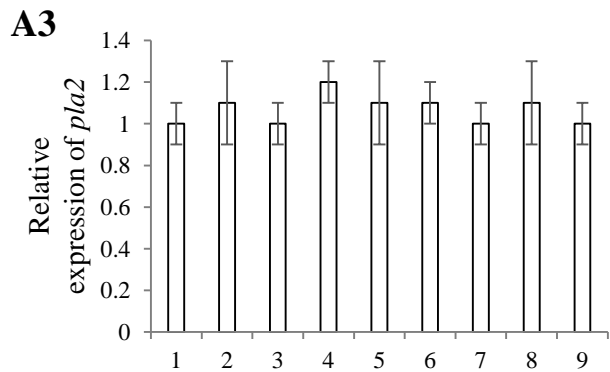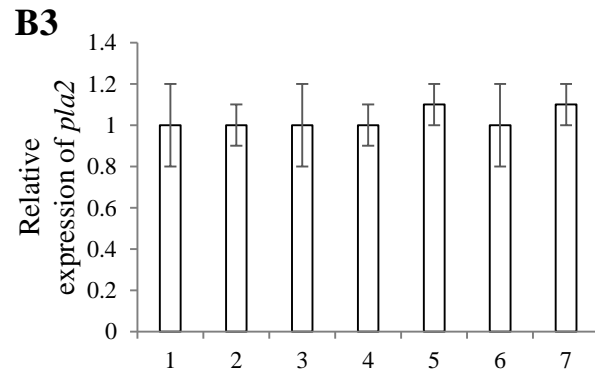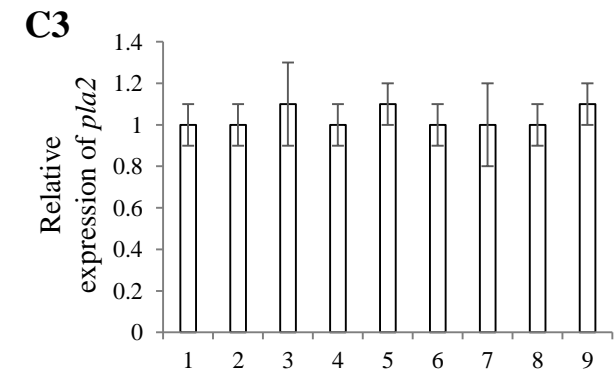

**Figure S2. FFA productivity of Rs-A2 grown under aerobic, semiaerobic, and photoheterotrophic conditions.** Rs-A2 was grown in Sis minimal medium under aerobic (High O<sub>2</sub>) (A1), semiaerobic (Low O<sub>2</sub>) (B1), and photoheterotrophic (PS) (C1) conditions, and culture aliquots were harvested during growth. The numbers 1 to 9 (for A and C) or 1 to 7 (for B) correspond to the time points of harvesting the culture broth. FFAs in the culture supernatant were determined, and the FFA titers and productivities are illustrated with error bars from three independent experiments (A2, B2 and C2). Expression of *pla2* was examined by RT-qPCR (A3, B3 and C3), and the mean ratios ( $\pm$  SD) of *pla2* expressions at time points 2 to 9 (A3 and C3) or 2 to 7 (B3) to the expression level of *pla2* at time point 1, which was set to 1, were determined from three independent experiments with 16S rRNA as a reference gene.

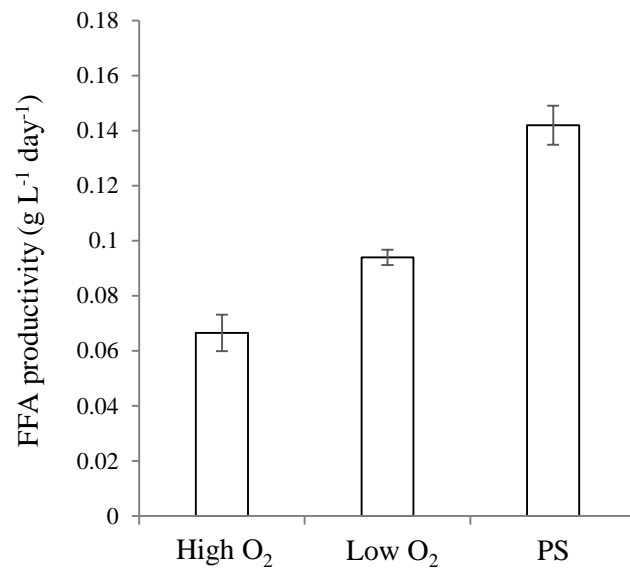

**Figure S3. Summary of FFA productivity of Rs-A2 grown under aerobic, semiaerobic, and photoheterotrophic conditions.** Rs-A2 was grown in Sis minimal medium under aerobic (High O<sub>2</sub>), semiaerobic (Low O<sub>2</sub>), and photoheterotrophic (PS) conditions as shown in Fig. S2, and culture aliquots were harvested at the end of exponential growth phase (OD<sub>660</sub> of 1.5 for High O<sub>2</sub>, OD<sub>660</sub> of 1.2 for Low O<sub>2</sub> and OD<sub>660</sub> of 2.3 for PS). FFAs in the culture supernatant were determined, and the representative FFA productivities of Rs-A2 are illustrated with error bars from three independent experiments.

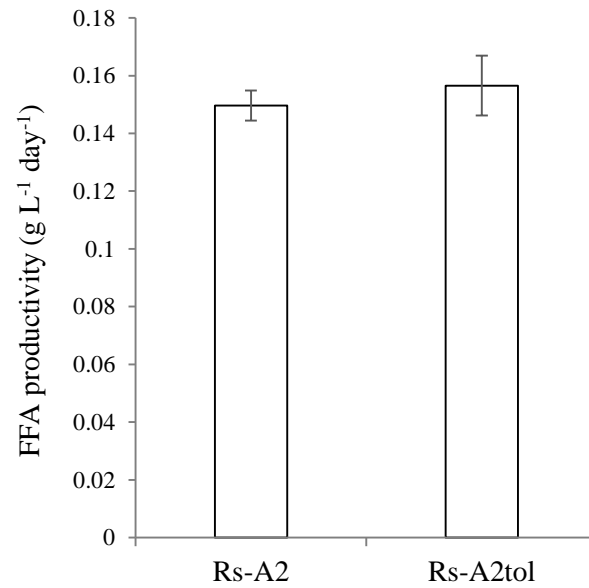

**Figure S4. FFA productivity of Rs-A2 and Rs-A2tol grown under photoheterotrophic conditions.** Rs-A2 and Rs-A2tol were grown photoheterotrophically in Sis minimal medium, and cells were harvested at the exponential growth phase (OD<sub>660</sub> of 2.3 and 2.2 for Rs-A2 and Rs-A2tol, respectively). FFAs in the culture supernatant were determined and are illustrated with error bars from three independent experiments.



```

Ec_plsC  1  MLYLRLIITVIYSILV-----CVFGSIYCLFSPRNPK-H-VATFGHM-FGRLAPIFG
Rs_plsC  1  MRTALQWIRSIILFNIVMYVSMIAIALAFTPLVLVDRK-WAPVWMRI FARWTRFTLRWIAG
Rc_plsC  1  -MIVWQYIRSVLFIAQMYVMLAVYATVGLPYALIGGRSAAIHVCRGYCKWVCWTAGWMVG

Ec_plsC  51  LKVECRKPTDAESYGNALYIANHQNNYDMVTASNIVQPPPTVTVGKKSLLWIPFFGQLYWL
Rs_plsC  60  LRTEVRGE---IPTTGALIASKHQSFILLESV-IPAPRFIMKKQLAWIPLMGWMALQ
Rc_plsC  60  IKTEYRGE---IPTGDVLIAAKHQSFDFIILMIYAA-IPRGKFIMKKELVWTFVGVYAWM
          ↑      ↑

Ec_plsC  111  TGNLLIDRNNRTKAHGTIAEVVNHFKRRRISLWMFPEGTRSRGRCLLPFKTGAFHAAIAA
Rs_plsC  116  AGFIPVDRGKRGAAIKKMMADVEKGRATPGQLIYFQGTRVAPGALPYKMGTAALYQQL
Rc_plsC  116  IGCVPVDRGKRGAAIKGMLEQAKDARFAGGQLVIFAQGTRVAAGAKPKYKIGAGALYNEL
          ┌───────────┐
          │           │

Ec_plsC  171  GVPIIPVVCVSTTSNKI-NLNRLHNGLVIVEMLPPIDVSYGKDQVRELAAHCRSIMEQKI
Rs_plsC  176  DQPCYPVAANVGVFWPRHGIYRRPGTAVVEFLPPIQPGQTAAAFMVELETATIEDASNRLI
Rc_plsC  176  GLPCVPAATNVGVFWPRHAVLRKPLAVVEFLPQIAPGMAMGEYMKVIEAQIEIASDKLM

Ec_plsC  230  AELDKEVAEREAAGKV
Rs_plsC  236  AEARQG-----
Rc_plsC  236  AEAGLKI-----

```

**Figure S5. Sequence alignment of PlsCs.** The amino acid sequences of PlsCs from *E. coli*, *R. sphaeroides* and *R. capsulatus* were aligned using the software BOXSHADE (version 3.21). Identical residues are shaded in black, and similar residues are shaded in gray. The residues corresponding to the conserved catalytic motif (HX<sub>4</sub>D) and the substrate binding motif (EGTR) of *E. coli* PlsC are indicated by two arrows and a box, respectively.

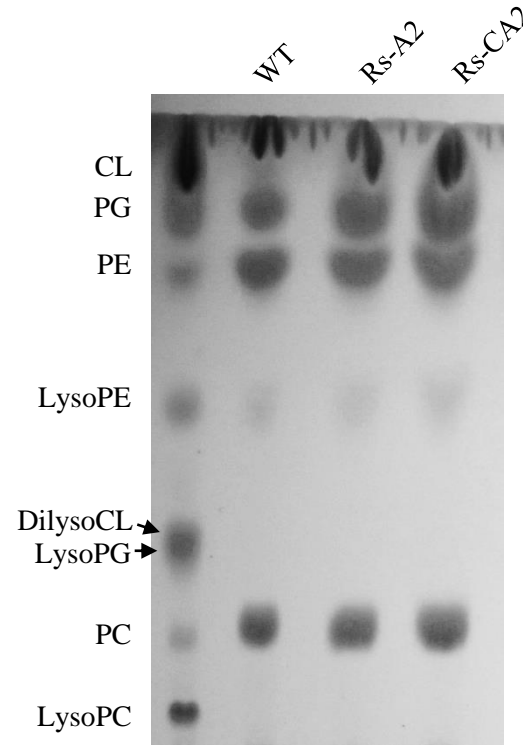

**Figure S6. Cellular PL compositions of Rs-A2 and Rs-CA2 grown under photoheterotrophic conditions.** Rs-A2 and Rs-CA2 were grown photoheterotrophically in Sis minimal medium and harvested at the exponential growth phase ( $OD_{660}$  of 2.5, 2.3 and 2.2 for WT, Rs-A2 and Rs-CA2, respectively). WT cells were included as a control. Membrane lipids were extracted from WT, Rs-A2, and Rs-CA2 cells, and aliquots (30  $\mu$ g each) were subjected to TLC analysis. To determine the migration profiles of LPLs, membrane lipids of WT cells (400  $\mu$ g) were digested by 5  $\mu$ g of honey bee venom PLA2 (Sigma-Aldrich) as described in section 2.7 (leftmost lane). LPLs from Sigma-Aldrich were used to localize the positions of lysoPE, dilysoCL, lysoPG, and lysoPC. CL, cardiolipin; PG, phosphatidylglycerol; PE, phosphatidylethanolamine; PC, phosphatidylcholine. Sulfoquinovosyl diacylglycerols (SQDGs) are not a substrate for PLA2. Furthermore, SQDGs were not detected under this TLC condition when developed with a mixture of chloroform-methanol-acetic acid-acetone-water (35:25:4:14:2, vol/vol) [49]. The experiments were independently repeated three times; the data shown are for one of three representative experiments.

**A**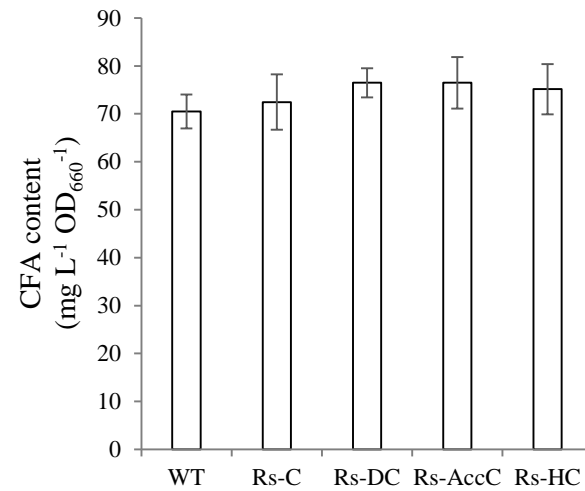**B**

| Light-harvesting complexes<br>(nmole/mg protein) |                       |                   |
|--------------------------------------------------|-----------------------|-------------------|
| Strains                                          | B800-850 <sup>a</sup> | B875 <sup>b</sup> |
| WT                                               | 7.0 ± 0.7             | 6.0 ± 0.3         |
| Rs-C                                             | 7.4 ± 0.4             | 6.1 ± 0.4         |
| Rs-DC                                            | 6.8 ± 1.0             | 5.7 ± 0.6         |
| Rs-AccC                                          | 6.8 ± 1.1             | 5.8 ± 0.4         |
| Rs-HC                                            | 7.1 ± 0.5             | 6.1 ± 0.2         |

<sup>a</sup>A<sub>849-900</sub> with  $\epsilon$  of 96 mM<sup>-1</sup> cm<sup>-1</sup>.

<sup>b</sup>A<sub>878-820</sub> with  $\epsilon$  of 73 mM<sup>-1</sup> cm<sup>-1</sup>.

**C**

| Strain            | WT  | Rs-C | Rs-DC | Rs-AccC | Rs-HC |
|-------------------|-----|------|-------|---------|-------|
| Doubling time (h) | 3.0 | 3.0  | 3.1   | 3.1     | 3.1   |

All these cells grew to OD<sub>660</sub> values of approximately 3.2.

**Figure S7. CFA content, light-harvesting complex level, and growth of recombinant *R. sphaeroides* strains Rs-C, Rs-DC, Rs-AccC, and Rs-HC under photoheterotrophic conditions.**

(A) Cells were grown photoheterotrophically in Sis minimal medium and harvested at the exponential growth phase (OD<sub>660</sub> of 2.5, 2.5, 2.5, 2.6 and 2.6 for WT, Rs-C, Rs-DC, Rs-AccC and Rs-HC, respectively). CFA content was determined and is shown with error bars from three independent experiments. WT cells were included as a control. (B) The levels of light-harvesting complexes of the recombinant *R. sphaeroides* strains grown and harvested as described in (A) were determined and are shown as the mean ± SD from three independent experiments. (C) Doubling times of recombinant *R. sphaeroides* strains were determined and are shown with WT cells as a control. The growth data presented here were reproduced within SDs of 10-15%. All the experiments were independently repeated three times.

**A**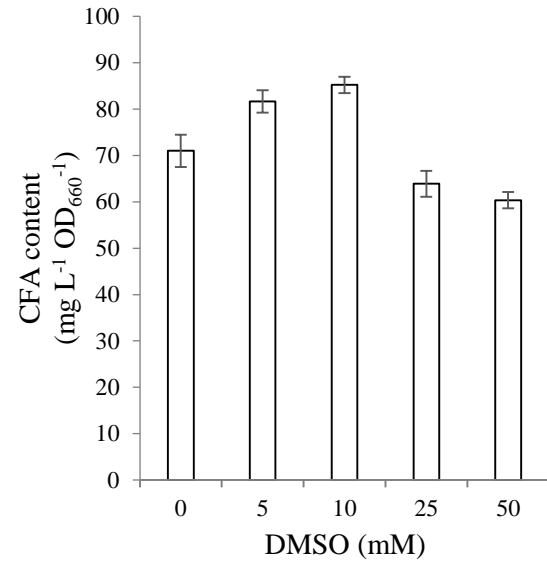**B**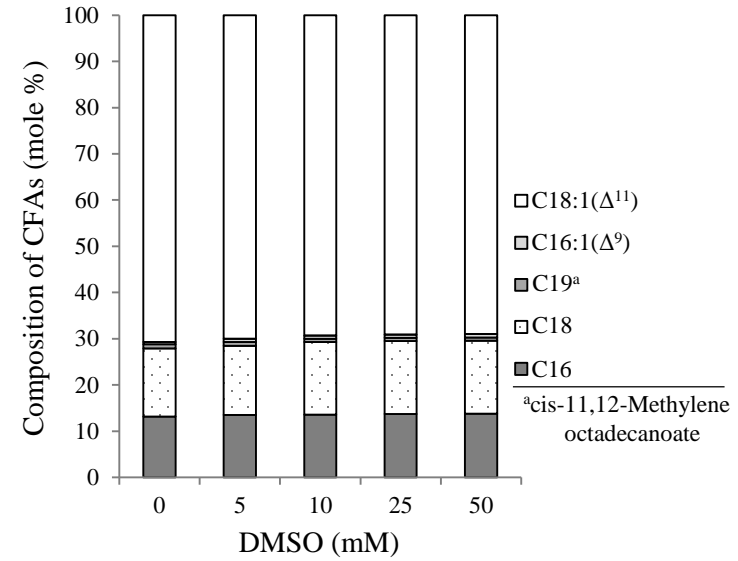**C**

| DMSO (mM)                 | 0   | 5   | 10  | 25  | 50  |
|---------------------------|-----|-----|-----|-----|-----|
| Doubling time (h)         | 3.0 | 3.0 | 3.2 | 4.0 | 4.3 |
| Maximal OD <sub>660</sub> | 3.2 | 3.2 | 3.2 | 2.8 | 2.6 |

**D**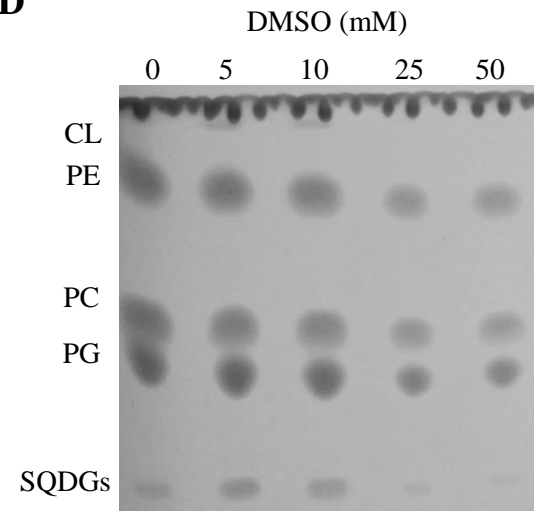

**Figure S8. CFA content and CFA and cellular PL compositions of *R. sphaeroides* WT cells grown in the presence of DMSO under photoheterotrophic conditions.** (A) WT cells were grown photoheterotrophically in Sis minimal medium supplemented with varying levels of DMSO and harvested at the exponential growth phase ( $OD_{660}$  of 2.6). CFA content was determined and is shown with error bars from three independent experiments. (B) CFA compositions of WT cells grown and harvested as described in (A) were determined. (C) Doubling time and maximal growth of cells cultured at varying levels of DMSO. The growth data presented here were reproduced within SDs of 10-15%. (D) Membrane lipids of WT cells grown and harvested as described in (A) were prepared, and aliquots (30  $\mu$ g each) were analyzed by TLC. All the results shown here were similarly reproduced in three independent experiments, and the data shown are for one of three representative experiments. CL: Cardiolipin, PE: phosphatidylethanolamine, PC: phosphatidylcholine, PG: phosphatidylglycerol, SQDGs: sulfoquinovosyl diacylglycerols.

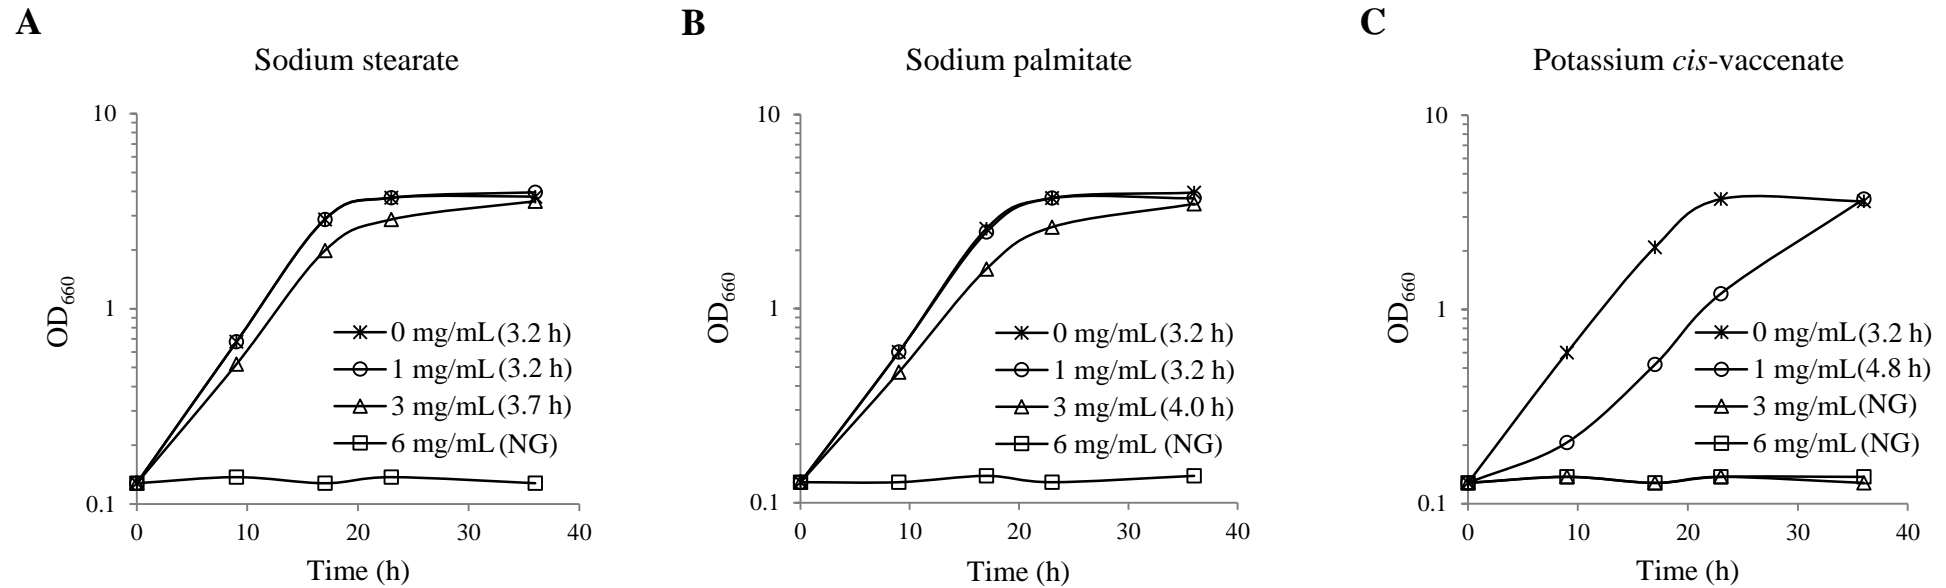

**Figure S9. Effect of exogenous FAs on the growth of *R. sphaeroides* WT cells under photoheterotrophic condition.** WT cells were grown photoheterotrophically in Sis minimal medium supplemented with varying levels of FFAs: sodium stearate (A), sodium palmitate (B) and potassium *cis*-vaccenate (C). The experiments were independently repeated three times; data shown are for one of three representative experiments.

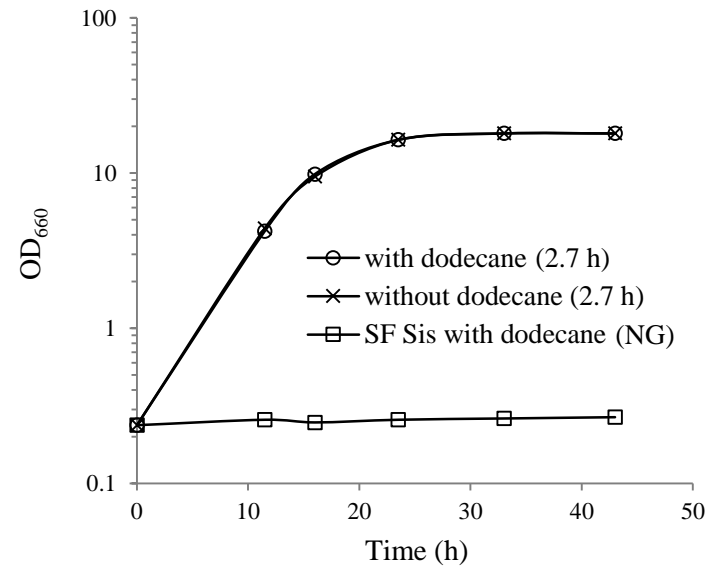

**Figure S10. Effect of dodecane on the growth of *R. sphaeroides* WT cells under photoheterotrophic condition.** WT cells were grown photoheterotrophically in SisH medium with (open circle) or without (cross) 30% dodecane. No cell growth was observed in succinate-free Sis minimal medium (SF Sis) supplemented with 30% dodecane (open box), which indicates that dodecane is not used as a sole carbon source. The results shown here were similarly reproduced in three independent experiments, and the data shown are for one of three representative experiments. NG stands for no growth.

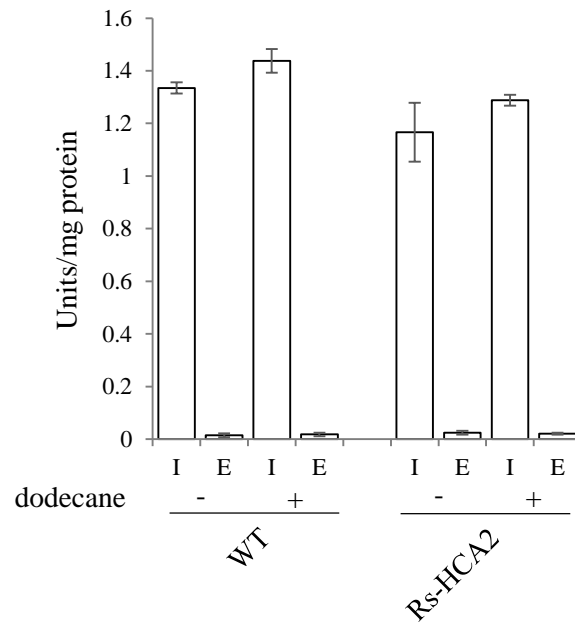

**Figure S11. Malate dehydrogenase activities of *R. sphaeroides* WT cells and Rs-HCA2.** Cells were grown photoheterotrophically in SisH-D medium with (+) or without (-) dodecane (30%, v/v). Aliquots (10 mL) of cell culture were harvested at the exponential growth phase ( $OD_{660}$  of 9.5 for WT in the absence and the presence of dodecane, respectively;  $OD_{660}$  of 5.4 and 16.0 for Rs-HCA2 in the absence and the presence of dodecane, respectively), and cell-free lysate was prepared as described in section 2.11. Culture supernatant was concentrated approximately tenfold using Amicon® Ultra-4 centrifugal Filters-3K (Merck, Ireland). Malate dehydrogenase activities in both intracellular (I: cell lysate) and extracellular (E: culture supernatant) fractions from 10 mL of culture were determined and shown as the mean  $\pm$  SD from three independent experiments. WT cells were included as a control. Extracellular activities are less than 1% of the total activities, which are the sum of intracellular and extracellular activities. One unit of malate dehydrogenase activity is defined as the amount of the enzyme that produces 1  $\mu$ mole of product per min under the conditions specified in section 2.11.



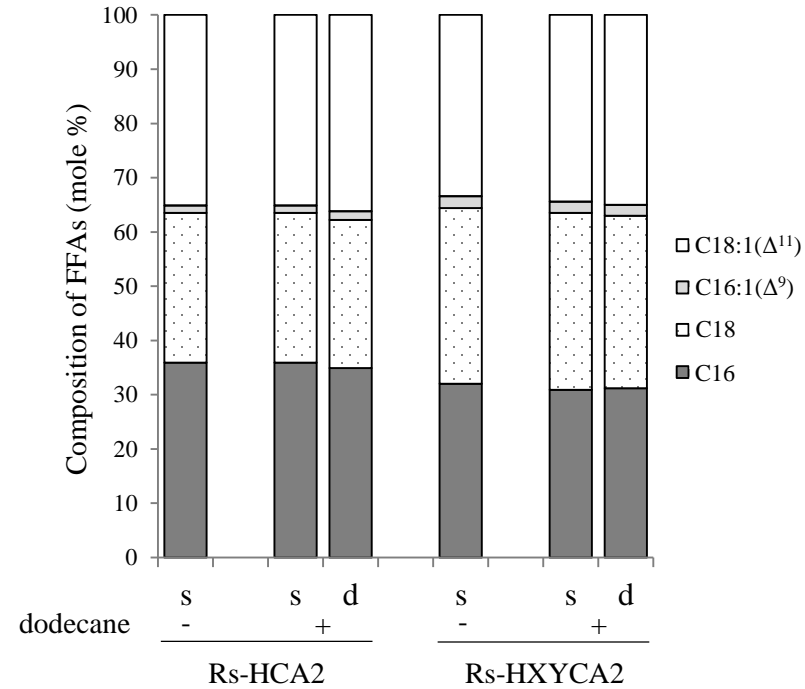

**Figure S12. FFA compositions of Rs-HCA2 and Rs-HXYCA2.** Cells were grown photoheterotrophically in SisH-D medium with (+) or without (-) dodecane (30%, v/v). Cells were harvested at the exponential growth phase ( $OD_{660}$  of 5.3 and 5.4 for Rs-HCA2 and Rs-HXYCA2 in the absence of dodecane, respectively;  $OD_{660}$  of 16.0 and 14.0 for Rs-HCA2 and Rs-HXYCA2 in the presence of dodecane, respectively), and the FFAs in the culture supernatant (s) and dodecane layer (d) were determined from three independent experiments. The results were reproduced within SDs of 10-15%, and the data shown are for one of three representative experiments.

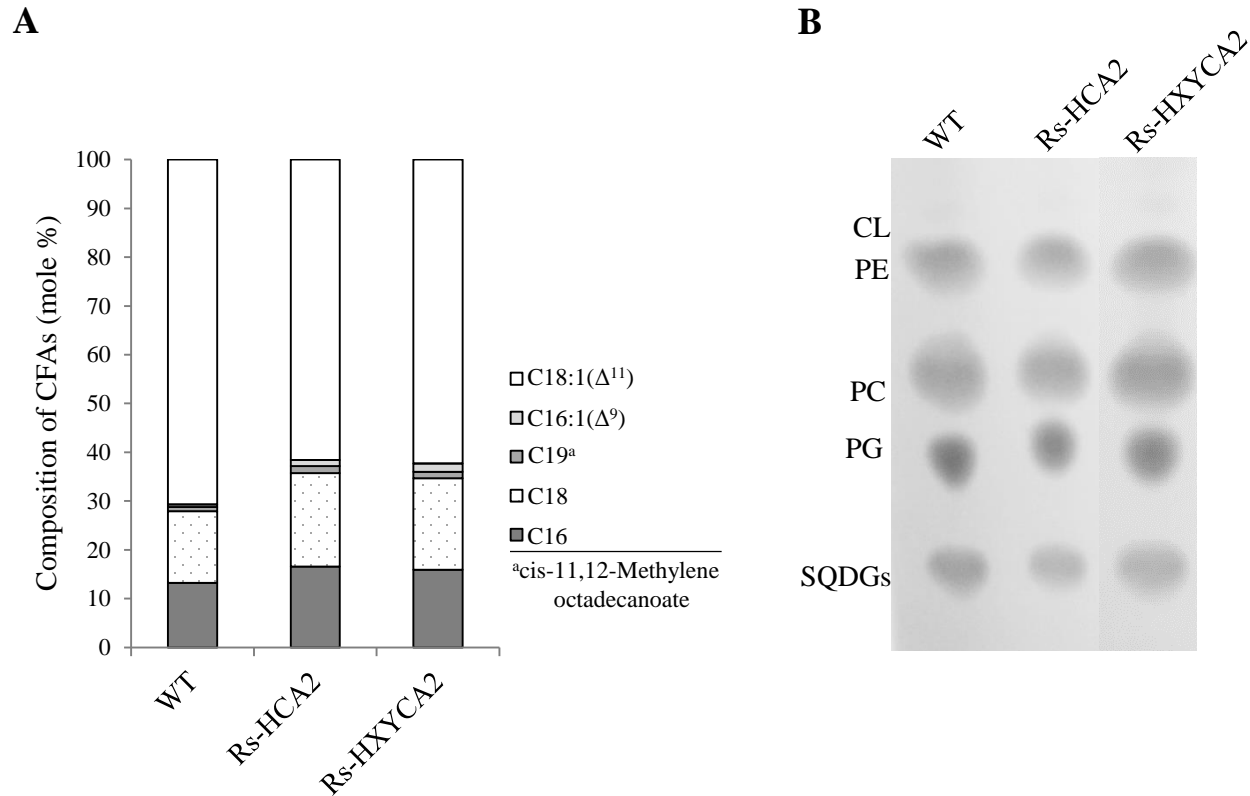

**Figure S13. CFA and cellular PL compositions of *R. sphaeroides* WT, Rs-HCA2, and HXYCA2 cells.** (A) Cells were grown photoheterotrophically in SisH-D medium and harvested at the exponential growth phase ( $OD_{660}$  of 9.5, 5.3 and 5.4 for WT, Rs-HCA2 and Rs-HXYCA2, respectively). CFA compositions were determined from three independent experiments; results were reproduced within SDs of 10-15%, and the data shown are for one of three representative experiments. (B) Membrane lipids of cells grown and harvested as described in (A) were prepared, and aliquots (30  $\mu$ g each) were analyzed by TLC. All the results shown here were similarly reproduced in three independent experiments, and the data shown are for one of three representative experiments. CL: cardiolipin, PE: phosphatidylethanolamine, PC: phosphatidylcholine, PG: phosphatidylglycerol, SQDGs: sulfoquinovosyl diacylglycerols.

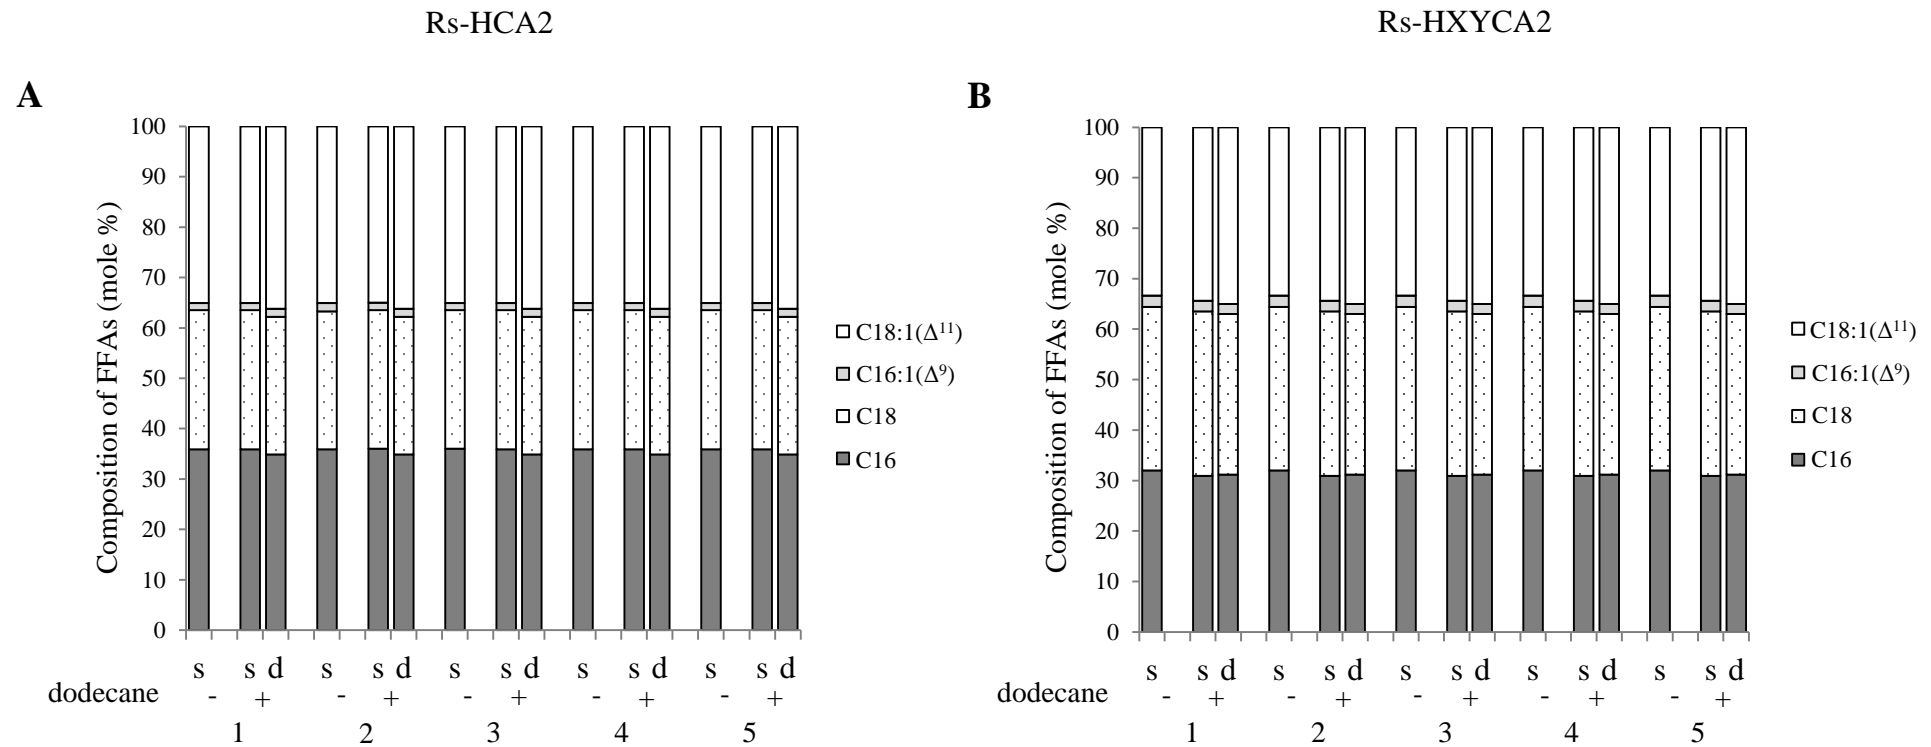

**Figure S14. FFA compositions of Rs-HCA2 and Rs-HXYCA2 grown under photoheterotrophic conditions.** Rs-HCA2 (A) and Rs-HXYCA2 (B) were grown photoheterotrophically in SisH-D medium with (+) or without (-) 30% dodecane (v/v), and culture aliquots were harvested during growth. The FFAs in the culture supernatant (s) and dodecane layer (d) were determined from three independent experiments. The results were reproduced within SDs of 10-15%, and the data shown are for one of three representative experiments. The numbers 1 to 5 correspond to the time points at which the culture aliquots (and the dodecane in dodecane-overlaid culture) were harvested in Figure 8.

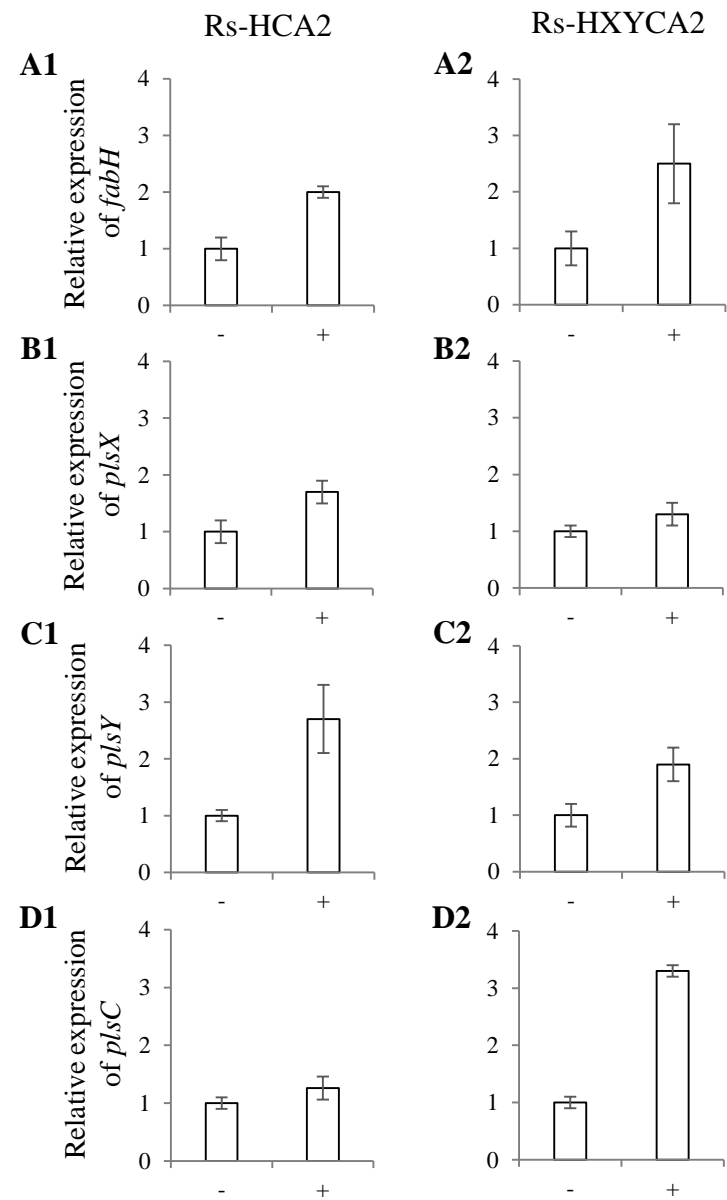

**Figure S15. Relative expressions of *fabH*, *plsX*, *plsY*, and *plsC* of Rs-HCA2 and Rs-HXYCA2.** Rs-HCA2 and Rs-HXYCA2 were grown photoheterotrophically in SisH-D medium with (+) or without (-) dodecane (30%, v/v), and cells were harvested at the exponential growth phase (OD<sub>660</sub> of 5.3 and 5.4 for Rs-HCA2 and Rs-HXYCA2 in the absence of dodecane, respectively; OD<sub>660</sub> of 16.0 and 14.0 for Rs-HCA2 and Rs-HXYCA2 in the presence of dodecane, respectively), Expression levels of *fabH*, *plsX*, *plsY*, and *plsC* were examined by RT-qPCR, and the results in the presence (+) of dodecane were expressed as a mean ratio ( $\pm$  SD) with respect to the corresponding values in the absence (-) of dodecane from three independent experiments. The 16S rRNA was used as a reference gene.

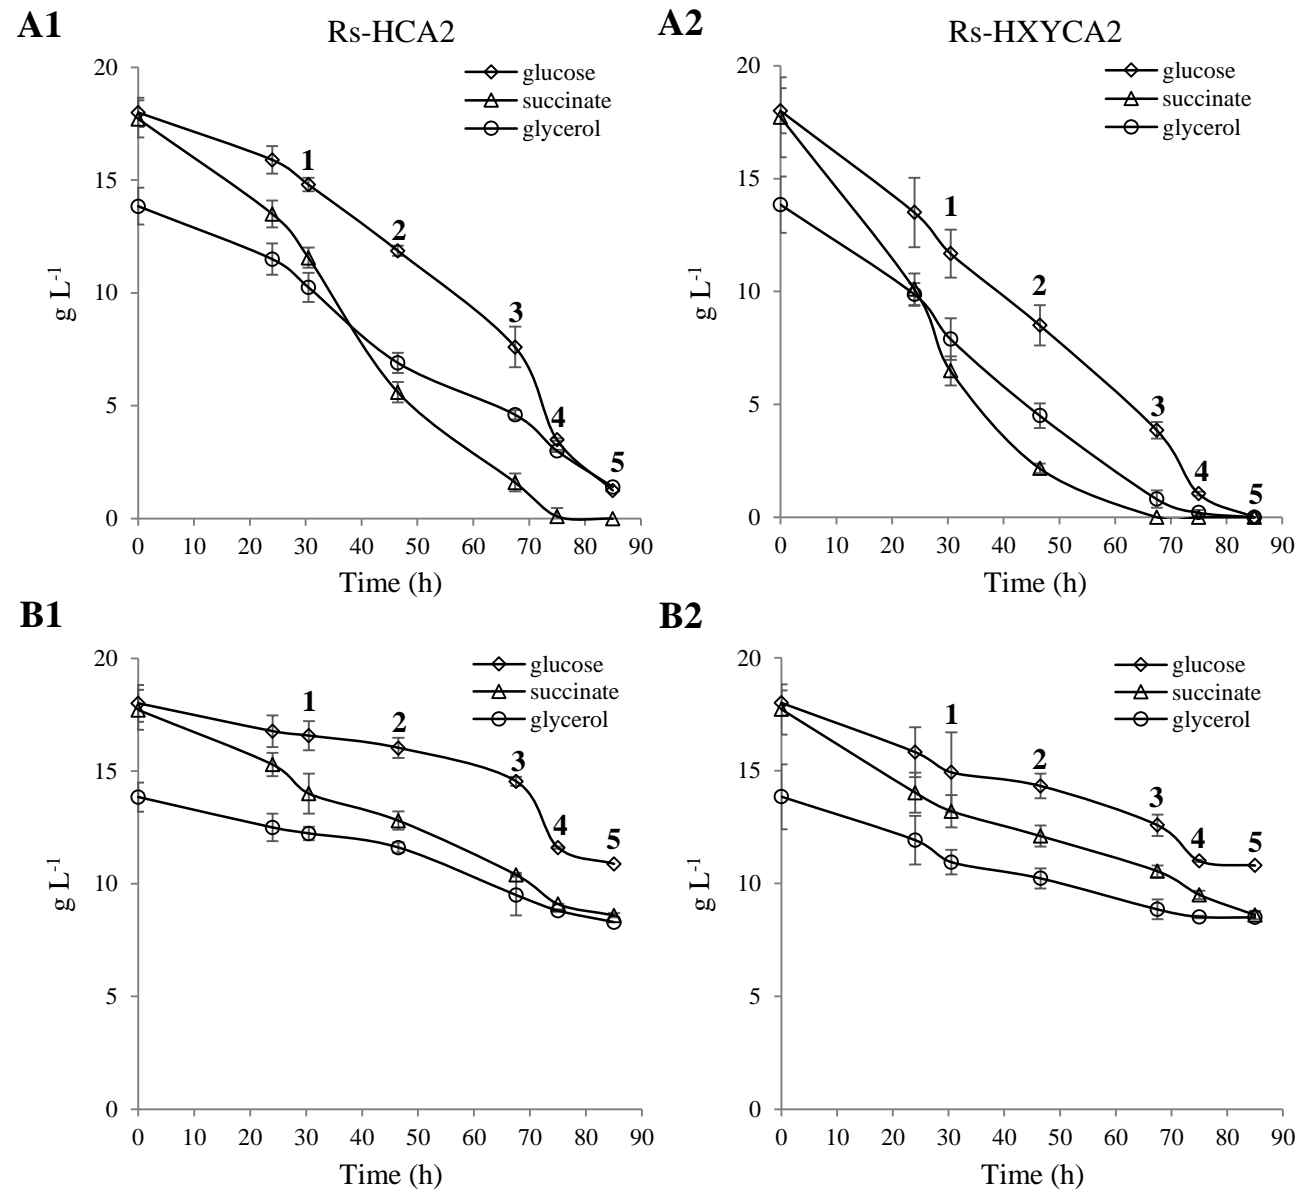

**Figure S16. Consumption of carbon sources by Rs-HCA2 and Rs-HXYCA2 grown under photoheterotrophic conditions.** (A1, B1) Rs-HCA2 and (A2, B2) Rs-HXYCA2 were grown photoheterotrophically in SisH-D medium with (A1, A2) or without (B1, B2) 30% dodecane (v/v), and cells were harvested during growth. Carbon sources (glucose [diamond], succinate [triangle], and glycerol [circle]) in the culture supernatant were measured and are illustrated with error bars from three independent experiments. The numbers 1 to 5 correspond to the time points at which cells were harvested in Figure 8.
